# Supplementary material
Source: PubMed Central journal article supplement (PMC4771348)
Supplement: IAI.01071-15_zii999091595so1.pdf [file IAI.01071-15_zii999091595so1.pdf]

## **SUPPLEMENTAL MATERIAL**

### **MATERIALS AND METHODS**

#### **Details of experiments to determine the localization of glycolytic enzymes on the surface of *M. pneumoniae* cells.**

For fluorescence microscopy, mycoplasma cells were cultured in cavities of a chamber slide (Thermo, Dreieich, Germany) and treated as described (1). Briefly, fixed mycoplasmas with formaldehyde (10% in PBS, Merck) for 20 min were incubated with a mixture of guinea pig antiserum against a glycolytic enzyme and rabbit antiserum to the TX 100-insoluble fraction (representing the membrane-associated protein fraction (2)) of *M. pneumoniae* total proteins (1:250 each). A mixture of FITC-labeled anti-guinea pig IgG (Sigma) and TRITC-labeled anti-rabbit IgG (Sigma, 1:500 each) antibodies were added for detection. Pre-immune serum from a guinea pig and antiserum to total proteins of *M. pneumoniae* were used as negative and positive controls, respectively. The fluorescence signals of the cells were checked at 400x using a fluorescence microscope (Axioskop, Carl Zeiss, Jena, Germany).

Furthermore, surface association of the proteins was tested with the colony blot technique as described (1). Briefly, nitrocellulose (Schleicher & Schuell, Dassel, Germany) with blotted mycoplasma colonies was treated with guinea pig antibodies to glycolytic proteins, to total proteins of *M. pneumoniae* (positive control), to Eno of *M. pneumoniae* (cytosolic protein (1, 3)) and to pre-immune serum (negative control; 1:250 each). Detection was performed with HRP-conjugated anti-guinea pig IgG (1:750).

After analyzing the cleavage sites of glycolytic enzymes for chymotrypsin ([http://web.expasy.org/peptide\\_cutter/](http://web.expasy.org/peptide_cutter/)), mild proteolysis of *M. pneumoniae* cells was carried out. Freshly grown mycoplasmas were harvested as described and adjusted to a protein concentration of 200 µg/ml PBS. The cells were centrifuged (13000 g, 5 min) and treated with 0, 5, 10 and 40 µg of chymotrypsin (Sigma) in PBS for 30 min at 37 °C. After a further centrifugation step (13000 g, 10 min), the pellet was resuspended in 100 µl sample buffer (3)

and boiled for 10 min. The proteins were separated by SDS-PAGE and blotted to nitrocellulose. Membranes were incubated with guinea pig antisera to glycolytic enzymes (1:250 each). Sera to cytosolic Eno of *M. pneumoniae* (negative control) and the surface-exposed C-terminal part of P1 adhesin were used as negative and positive controls. Proteins and digestion products were detected using peroxidase-conjugated anti-guinea pig IgG (1:750).

## LEGENDS TO FIGURES

**FIG S1** Glycolysis in *M. pneumoniae* (after (4), modified) and glycolytic enzymes included in the study (dashed frames: proteins investigated in previous studies, see Table 1).

**FIG S2** Concentration-dependent binding of human plasminogen (Plg) to immobilized surface-displayed glycolytic enzymes of *M. pneumoniae* and to BSA (15 µg/ml each) as measured by ELISA. Bound Plg was detected by rabbit anti-Plg and HRP-conjugated anti-rabbit IgG. Error bars indicate standard deviation of eight replicates of a representative experiment.

**FIG S3** Influence of pre-incubation of human Plg with recombinant proteins on binding of Plg to recombinant proteins. Wells of ELISA plates were coated with recombinant proteins (15 µg/ml) derived from surface-displayed glycolytic enzymes of *M. pneumoniae*. Plg (2,5 µg/ml) was pre-incubated with each of these recombinant proteins (15 µg/ml; room temperature, 90 min). Mixture was added to immobilized recombinant proteins and incubated for 2 h at 37 °C. Bound Plg was detected with rabbit anti-Plg (1:2,500) and anti-rabbit IgG (1:1,000). Binding of Plg after incubation with BSA was used as negative control and set to 100 %. Data of wells incubated with mixture of Plg and recombinant protein are calculated as percentages of negative control. Mean and standard deviation of eight replicates.

**FIG S4** Detection of glycolytic enzymes of *M. pneumoniae* in the supernatant of 4-days old bouillon cultures. Supernatant (50 ml) was filtered (0.22 µm) to remove non-adherent bacteria

and concentrated to 1,000  $\mu$ l by centrifugation through Vivaspin columns (MWCO: 10,000). Concentrated supernatant was used to coat wells of ELISA plates and occurrence of glycolytic enzymes was confirmed by incubation with guinea pig antisera to recombinant proteins (1:100) followed by HRP-conjugated anti-guinea pig IgG (1:750). Antiserum to total proteins of *M. pneumoniae* (M.p.) was used as positive control. Mean and standard deviation of two independent experiments with eight replicates each are shown.

**FIG S5** Results of treatment of freshly grown *M. pneumoniae* cells with chymotrypsin (30 min; 37 °C). Digestion products of glycolytic enzymes were detected by incubation of SDS-separated and blotted whole proteins of cells with guinea pig antisera to recombinant proteins and anti-guinea pig IgG (lane 1: 0  $\mu$ g; lane 2: 40  $\mu$ g chymotrypsin). Antisera to recombinant protein P12 (surface-localized C-terminal part of P1 adhesin), to Eno of *M. pneumoniae* and pre-immune serum (PIS) were used as positive and negative controls, respectively.

## TABLES

**TABLE S1** Oligonucleotides used in the study (underlined: vector-specific sequence; double underlined: mutation of TGA to TGG)

| Target      | Oligonucleotide | Sequence (5' → 3')                                         | Description    |
|-------------|-----------------|------------------------------------------------------------|----------------|
| <i>AckA</i> | MpAckAf1        | GAA TAA TAC CTA CAG CTG TCG                                | Amplification, |
|             | MpAckAf2        | TAG CGC CAC TGC ACA ACA AG                                 | cloning and    |
|             | MpAckAf3        | ATT GGT TAT GTA GCA GAA CAG G                              | sequencing     |
|             | MpAckAr         | GAC TTG GTA CTT ACT CCC ATC                                |                |
|             | MpAckAVf        | <u>GAC GAC GAC AAG ATG</u> AAC GAC AAC AAA ATT TTA GTA G   |                |
|             | MpAckAVr        | <u>GAG GAG AAG CCC GGT</u> CTA TTT TTG AGT TAG TCG AAT GGA |                |
| <i>Pfk</i>  | MpPfkf1         | GAT CTC GAC AAA TTC CGC C                                  | Amplification, |
|             | MpPfkf2         | CTA AAT TGC TAA GCG AGT TGG G                              | cloning and    |
|             | MpPfkr          | GTA AGC TGG GTC ATC TAA CAT TG                             | sequencing     |

MpPfkVf      GAC GAC GAC AAG ATG AGT CCA AAA ACA ACC

MpPfkVr      GAG GAG AAG CCC GGT TTA AAT AAT ATT TTT ATT AAT GAC TG

---

|            |          |                                                        |                |
|------------|----------|--------------------------------------------------------|----------------|
| <i>Fba</i> | MpAldof1 | CAG TAC CGG TGA TGA AAT TGT G                          | Amplification, |
|            | MpAldof2 | GCT CGC ATT TAC CCT TTC AAG                            | cloning and    |
|            | MpAldor  | GGT TGA TTT ACC AAC GTT GGG                            | sequencing     |
|            | MpAldoVf | <u>GAC GAC GAC AAG ATG</u> CTA GTA AAC ATC AAA CAA ATG |                |
|            | MpAldoVr | <u>GAG GAG AAG CCC GGT</u> CTA AGC CTT ATT GGT TGA ACC |                |

---

|  |          |                                              |      |
|--|----------|----------------------------------------------|------|
|  | MpAldoM1 | P-CCG ACA ACT <u>GGA</u> AGG GTT TAA ACT ATG | MMR* |
|--|----------|----------------------------------------------|------|

---

|            |         |                                |                |
|------------|---------|--------------------------------|----------------|
| <i>Eno</i> | MpEnof1 | CAC CAC CAA AAT AGA TTT GTT TC | Amplification, |
|            | MpEnof2 | CAA TAA GGC TAA GTT AGG TGC    | cloning and    |
|            | MpEnof3 | CCA GGT AGT GAC ATT GCG        | sequencing     |
|            | MpEnof4 | CGA AGA CAC GAC AAT TGC TG     |                |

MpEnor GAT AAT GAG GGC AAT TGC TTT AG

MpEnoVf GAC GAC GAC AAG ATG AGT GCA CAA ACT GGA ACC

MpEnoVr GAG GAG AAG CCC GGT TTA AGC TTT TTGCGG TTT AAT G

---

MpEnoM1 P-CAA TAA TGC TAA GTA CTT AGG TTG GAAC

MMR

---

*Pgi* MpPgif1 CCT TGT GAC TTT ATG AGA GCT ATC

Amplification,

MpPgif2 GCA GTT GCT AGA GCA ATT AAG G

cloning and

MpPgif3 CAC GAC AAA GAA GCT CAA AAT AG

sequencing

MpPgir CGT CAT AGT GGA TTA AGC GC

MpPgiVf GAC GAC GAC AAG ATG GAA AGT AAA TGG TTA ACA G

MpPgiVr GAG GAG AAG CCC GGT CTA TTC ACG ACC AAG TTT AGC

---

MpPgiM1 P-GGT TTT TCA TGG GCT TTG GTA GTA AC

MMR

MpPgiM2 P-TGC TTT GCG TCA CTG GCT TTA C

---

|             |          |                                                                    |                               |
|-------------|----------|--------------------------------------------------------------------|-------------------------------|
| <i>GapA</i> | MpGapAf  | GAA TTA CTC GCC ATA GGT TAA AG                                     | Amplification,                |
|             | MpGapAr  | CTG AAA GTC AAA CGC TTG G                                          | cloning and                   |
|             | MpGapAVf | <u>GAC GAC GAC AAG ATG</u> CTA GCA AAG AGT AAG ACT ATC             | sequencing                    |
|             | MpGapAVr | <u>GAG GAG AAG CCC GGT</u> TTA AAG CTT GGC ACA ATA GTT AAC         |                               |
|             | MpGapAM1 | P-CTA ACC TGC CAT <u>GGG</u> CAG AAC AC                            | MMR                           |
| <i>Ldh</i>  | MpLdhVf  | <u>GAC GAC GAC AAG ATG</u> AAG AGT CTT AAA GTA GCA CTC ATT G       | Amplification,                |
|             | MpLdhVr  | <u>GAG GAG AAG CCC GGT</u> TTA TAG TTT AGC TAA CTT AAT GTT GTC CTT | cloning and<br><br>sequencing |
| <i>Pta</i>  | MpPtaf1  | CTG GTG GTG GTG CAT CTT TAG C                                      | Amplification,                |
|             | MpPtar   | GCA CCC GAC AAC CTC AAA C                                          | cloning and                   |
|             | MpPtaVf  | <u>GAC GAC GAC AAG ATG</u> AGT GTT ATT GAT CTT TTA AAA C           | sequencing                    |

|             |          |                                                                         |                |
|-------------|----------|-------------------------------------------------------------------------|----------------|
|             | MpPtaVr  | <u>GAG GAG AAG CCC GGT</u> TTA TTT AAG TGT TTG CGC TG                   |                |
|             | MpPtaM1  | P-CCT GAA GGT <u>TGG</u> TCG CCA                                        | MMR            |
| <i>FruK</i> | MpFruKf1 | GTC ATA ACC TGC TTG TAG TGC G                                           | Amplification, |
|             | MpFruKf2 | GAT TGC TTA CCT TAA GGC TAA CG                                          | cloning and    |
|             | MpFruKr  | CTT TGG CTG TTT GGC TAG TTC                                             | sequencing     |
|             | MpFruKVf | <u>GAC GAC GAC AAG ATG</u> CTT AAC CAC AAC AGT AAA GTT <u>TGG</u> ATA G |                |
|             | MpFruKVr | <u>GAG GAG AAG CCC GGT</u> TTA TAA ATA GTA ATA ATT AGT AGC TTT TAG CAC  |                |
| <i>Pgk</i>  | MpPgk1   | CGA ATC CTC TTA CGT AAA CCA G                                           | Amplification, |
|             | MpPgk2   | GAT GTG AAT GAG GCT GGT G                                               | cloning and    |
|             | MpPgk3   | GGA GGA AGA CTT AGT CCA AAC C                                           | sequencing     |
|             | MpPgkr   | CCA GCA CTT TGA ACA CGT TG                                              |                |
|             | MpPgkM1  | P-CAG TTC <u>TGG</u> GCA TCA TTG GGT G                                  | MMR            |



MpPgkM2 P-CAA TGG CCA GCA GAA CTT CAG

---

|            |         |                                                              |                |
|------------|---------|--------------------------------------------------------------|----------------|
| <i>Pgm</i> | MpPgmf1 | GCA AGG CAT CTT TGG ATG TC                                   | Amplification, |
|            | MpPgmf2 | CAG TCA CAT GGA CCA TTT GTA TG                               | cloning and    |
|            | MpPgmf3 | GTC ACA CAT GCT CTT TCA AAC AG                               | sequencing     |
|            | MpPgmf4 | CTG ATA TGG TAG GTC ATA CTG GTA AC                           |                |
|            | MpPgmr  | GCC ATC AGA TAC ACC GAT ACC                                  |                |
|            | MpPgmVf | <u>GAC GAC GAC AAG ATG</u> CAT AAG AAG GTC TTA CTA GCC       |                |
|            | MpPgmVr | <u>GAG GAG AAG CCC GGT</u> TTA CTT TTT ACT TAT TAA AAG GGA G |                |

---

|             |          |                               |                |
|-------------|----------|-------------------------------|----------------|
| <i>ManB</i> | MpManBf1 | GAT AAG ACC CAG TTA TTC TGC   | Amplification, |
|             | MpManBf2 | GTG TGA TGT GAT TAC CTC TAT G | cloning and    |
|             | MpManBf3 | TTA CAT GGT ACT TCG GTG AAG   | sequencing     |
|             | MpManBf4 | GAC AAT GAA CTA GTA GTG G     |                |

MpManBf5 CCT AGT CGA ATA TGT CTT GG

MpManBVf GAC GAC GAC AAG ATG AAC AGT AAC GCA TAC TTG

MpManBvr GAG GAG AAG CCC GGT CTA AGC TTT ATC GAG GTT GAG C

---

MpManBM1 P-TAA GGA TAC CTG GGA GTT AGC G

MMR

MpManBM2 P-GCG ATT GCC GAA TGG AAT CCG

MpManBM3 P-TGG TGA TTA CTA TAA CTG GAC GG

---

*PdhA* MpPdhAf1 GTT AGC AGC CGT GTT GCA AG

Amplification,

MpPdhAf2 CAA CGA ACA GTT AAA GCA CGC

cloning and

MpPdhAf3 CAA AAC GCT GCC CAT TAA C

sequencing

MpPdhAf4 GCG AGT TAC GAA GCA ATG C

MpPdhAr GAT AGA TCC ATT GCG TTA CCC

MpPdhAvf GAC GAC GAC AAG ATG GCA ATT TTG ATT AAA AAC

MpPdhAVr     GAG GAG AAG CCC GGT TTA GTC TTT AAA GTA TTT TTT AGC

---

MpPdhAM1     P-GCT TGT TTG GCA ACG TGC TG     MMR

MpPdhAM2     P-GCT TTT ACT TTA CTG GAA CGG TAA C

MpPdhAM3     P-CCA TTC ACA AGT GGA ACT CGG

MpPdhAM4     P-CTT CTC TTG GCG TCA AGG TC

---

*PdhB*     MpPdhBf1     GTT GAC TCC TGA TCT AGC GC     Amplification,

MpPdhBf2     CAT GCC AAT GGG TGG TG     cloning and

MpPdhBf3     GGG TAA CGC AAT GGA TCT AG     sequencing

MpPdhBf4     GGA CAA GGG CAT TGA ACT C

MpPdhBr     CTA GGT GCA ATT ATT CTA ACA AAC

MpPdhBVf     GAC GAC GAC AAG ATG TCA AAA ACA ATT CAA GCA AAT AAC

MpPdhBvr     GAG GAG AAG CCC GGT TTA CTT TAA AAG TTG GTT AAC AGC TTC

---

|             |          |                                                                |                |
|-------------|----------|----------------------------------------------------------------|----------------|
|             | MpPdhBM1 | P-CGT ACC ATT TCC CCT <u>TGG</u> GAC AAG                       | MMR            |
| <i>PdhC</i> | MpPdhCf  | CAG CTA ACT GCA GTA AAT GCA AC                                 | Amplification, |
|             | MpPdhCr  | CAC ACG CCA CCA AAG TAT TC                                     | cloning and    |
|             | MpPdhCVf | <u>GAC GAC GAC AAG ATG</u> GCA AAT GAG TTT AAG TTC AC          | sequencing     |
|             | MpPdhCVr | <u>GAG GAG AAG CCC GGT</u> CTA AGC TAC TTC TAA ATC AAT TAA TTC |                |
| <i>PdhD</i> | MpPdhDf1 | CAT GGA AGA ACG TGT TGT GC                                     | Amplification, |
|             | MpPdhDf2 | CAA GAT TGT CGA TTA CCT CC                                     | cloning and    |
|             | MpPdhDr  | CTT CTA ACG CTG CGT TGA AG                                     | sequencing     |
|             | MpPdhDVf | <u>GAC GAC GAC AAG ATG</u> AAT TAC GAT CTC ATT ATT ATA G       |                |
|             | MpPdhDVr | <u>GAG GAG AAG CCC GGT</u> CTA TTT AAA GTG ATC AAA AAG AGC     |                |
|             | MpPdhDM1 | P-GTA GCA CTT ACC <u>TGG</u> AAC CAA TTG                       | MMR            |

|            |         |                                                               |                |
|------------|---------|---------------------------------------------------------------|----------------|
| <i>Pyk</i> | MpPykf1 | GAT CGC AGC GCT TTA ATT G                                     | Amplification, |
|            | MpPykf2 | CAC TTA CAA CAT GGT AAA CGA TG                                | cloning and    |
|            | MpPykf3 | GAG ATC CCA TAT TAC AAG GTG C                                 | sequencing     |
|            | MpPykr  | GAC GAT ATG GAG GTT GCA GC                                    |                |
|            | MpPykVf | <u>GAC GAC GAC AAG ATG</u> ATT CAC CAC CTAAAA CG              |                |
|            | MpPykVr | <u>GAG GAG AAG CCC GGT</u> TTA TAA GCT AAT GAT CTT ATT GTG AA |                |
|            | MpPykM1 | P-CTA <u>TGG</u> ACG CTA GCA ATG TTA GAT GAC CCA              | MMR            |
|            | MpPykM2 | P-CAA GGT GCC TTA <u>CTG</u> GCA ACG                          |                |
|            | MpPykM3 | P-CAG TGA GTT <u>TTG</u> GAA GCA GGT GG                       |                |
| <i>Tkt</i> | MpTktf1 | CCT AAT TGC CCA ACT AGC C                                     | Amplification, |
|            | MpTktf2 | GTG ATG GTG ATC TCC AGG AAG                                   | cloning and    |
|            | MPTktf3 | CAC AAG CAG GTC ATA GCA CG                                    | sequencing     |

MPTktf4 CAA GTC GGT GGT GAT GGA C

MPTktR GTA GGA ATA TAG TCC TTA AAC GAA C

MpTktVf GAC GAC GAC AAG ATG AAA AAC CTG TTT GCT TG

MpTktVr GAG GAG AAG CCC GGT TTA ACT CTT TAG AGT TTT AAT CAA C

---

MpTktM1 P-CAA CAT GGG GTG GAA TTA CC

MMR

MpTktM2 P-GTT TAT TAA TTG GAC GGA AAA CGA TTA

MpTktM3 P-CAG GTT TGG CGG CCT TGT

---

*TpiA* MpTpiAf1 GCA CCT GAT AAA GTA GTC CCA C

Amplification,

MpTpiAr GAG TTA CCG ATT TGT CCT TGT G

cloning and

MpTpiAVfR GAA GGA GA TAT ACA TAT GCG TAC GAA ATA CCT AAT TG

sequencing

MpTpiAVrR GTG ATG GTG GTG ATG ATG TGC ATA TAC TTG TGC CAT TAC

---

MpTpiAM1 P-GGT AAC TGG AAG ACA AAT AAG GAT TTA CAC

MMR

MpTpiAM2 P-GCT TAC GAA CCA ATT TGG GCA AT

---

pET ExpNF GTA TGA AAG AAA CCG CTG C Sequencing

vector

---

\* - multiple mutation reaction (5)

## REFERENCES

1. **Thomas C, Jacobs E, Dumke R.** 2013. Characterization of pyruvate dehydrogenase subunit B and enolase as plasminogen-binding proteins in *Mycoplasma pneumoniae*. *Microbiology* **159**:352-365.
2. **Regula JT, Boguth G, Görg A, Hegermann J, Mayer F, Frank R, Herrmann R.** 2001. Defining the mycoplasma “cytoskeleton”: the protein composition of the Triton X-100 insoluble fraction of the bacterium *Mycoplasma pneumoniae* determined by 2-D gel electrophoresis and mass spectrometry. *Microbiology* **147**:1045-1057.
3. **Gründel A, Friedrich K, Pfeiffer M, Jacobs E, Dumke R.** 2015. Subunits of the pyruvate dehydrogenase cluster of *Mycoplasma pneumoniae* are surface-displayed proteins that bind and activate human plasminogen. *PLoS One* **10**:e126600.
4. **Schmidl SR, Gronau K, Pietack N, Hecker M, Becher D, Stülke J.** 2010. The phosphoproteome of the minimal bacterium *Mycoplasma pneumoniae*: analysis of the complete known Ser/Thr kinome suggests the existence of novel kinases. *Mol Cell Proteomics* **9**:1228-1242.
5. **Hames C, Halbedel S, Schilling O, Stülke J.** 2005. Multiple-mutation reaction: a method for simultaneous introduction of multiple mutations into the *glpK* gene of *Mycoplasma pneumoniae*. *Appl Environ Microbiol* **71**:4097-4100.
