# Supplementary material
Source: PubMed Central journal article supplement (PMC4771348)

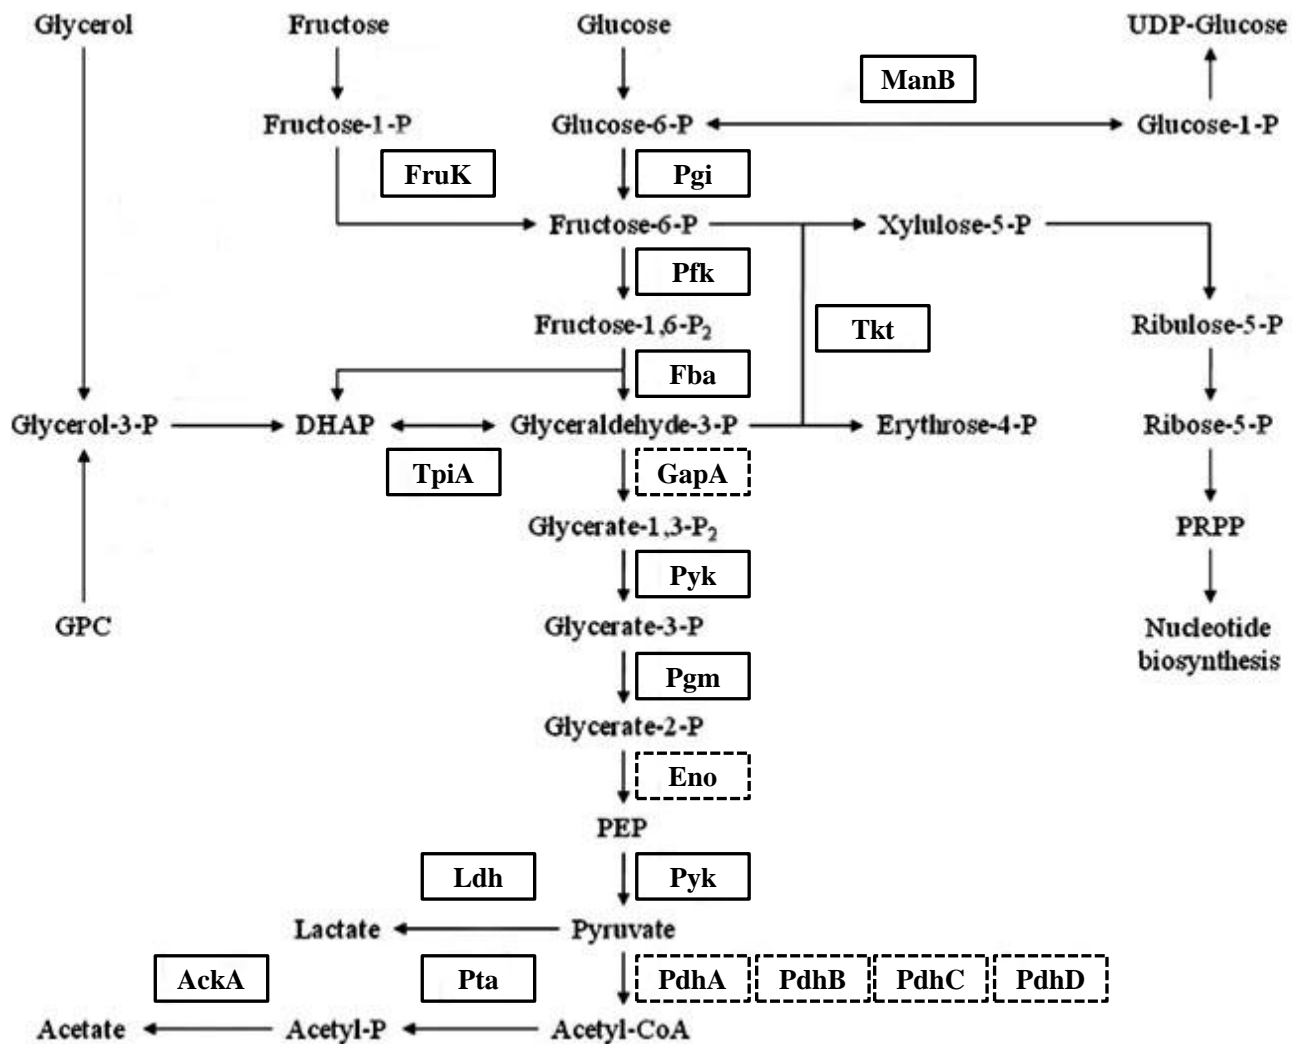

Supplement: IAI.01071-15_zii999091595so2.pdf [file IAI.01071-15_zii999091595so2.pdf]

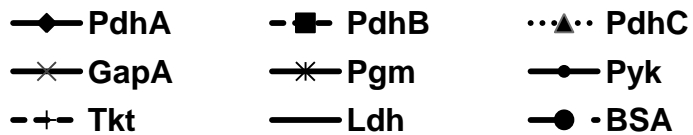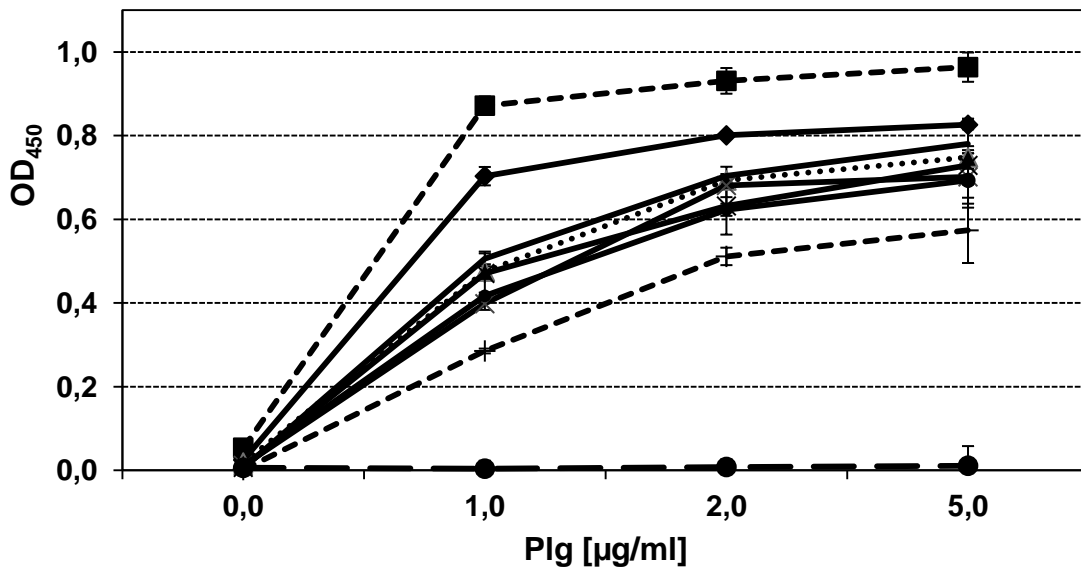

Supplement: IAI.01071-15_zii999091595so3.pdf [file IAI.01071-15_zii999091595so3.pdf]

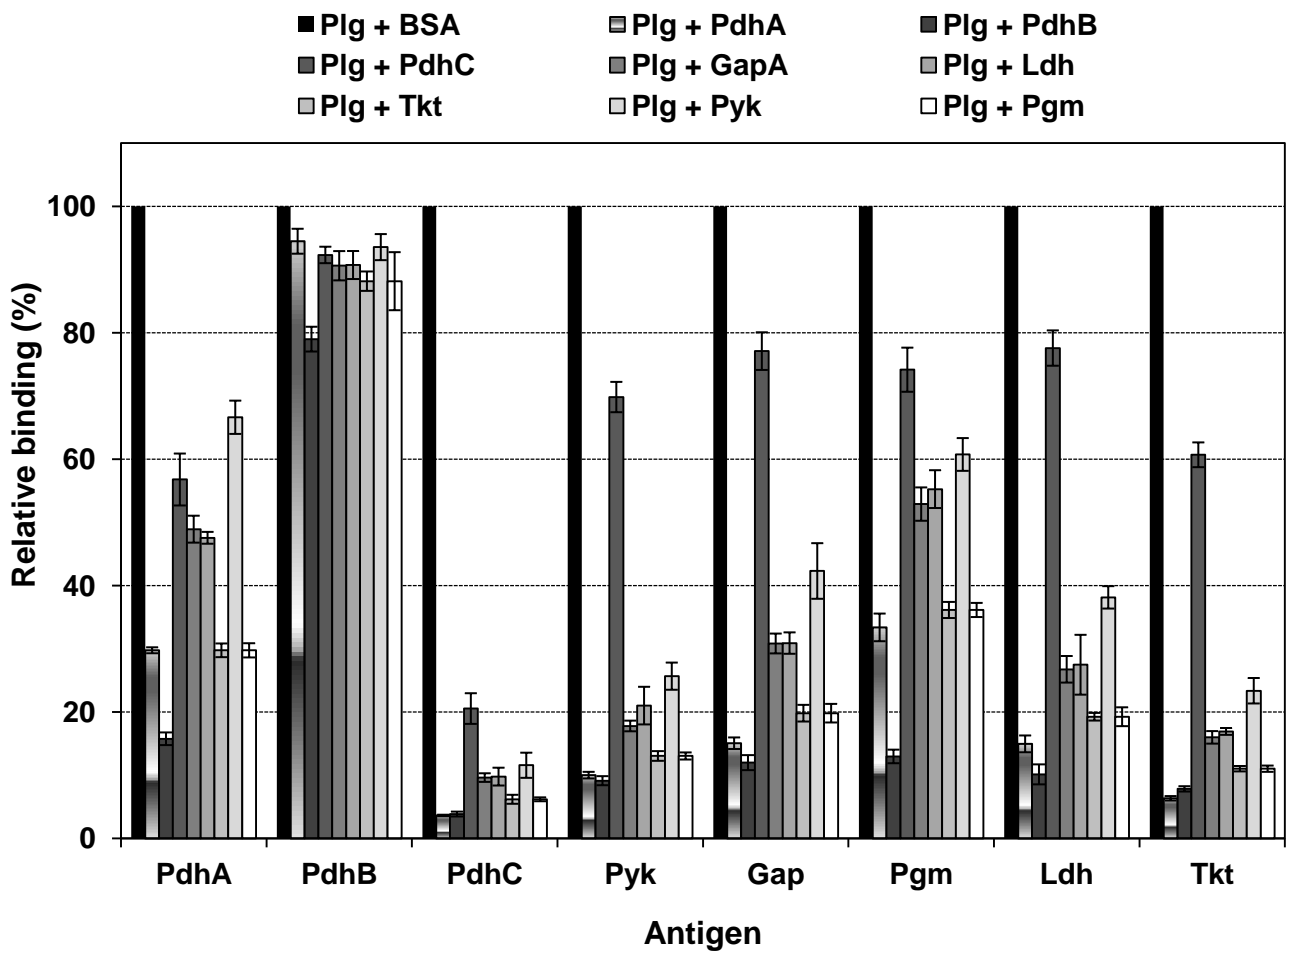

Supplement: IAI.01071-15_zii999091595so4.pdf [file IAI.01071-15_zii999091595so4.pdf]

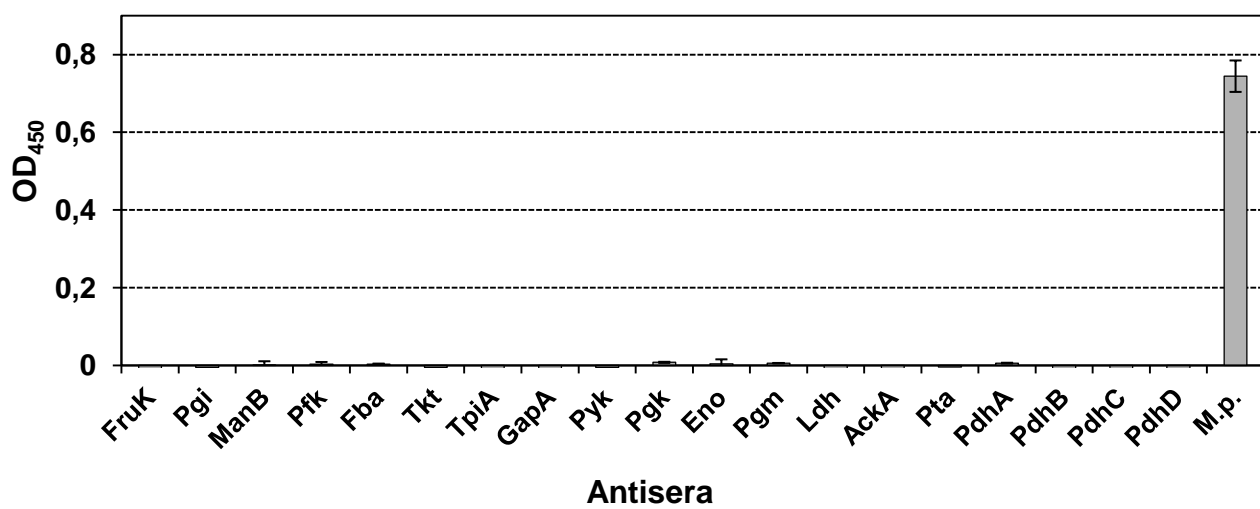

Supplement: IAI.01071-15_zii999091595so5.pdf [file IAI.01071-15_zii999091595so5.pdf]

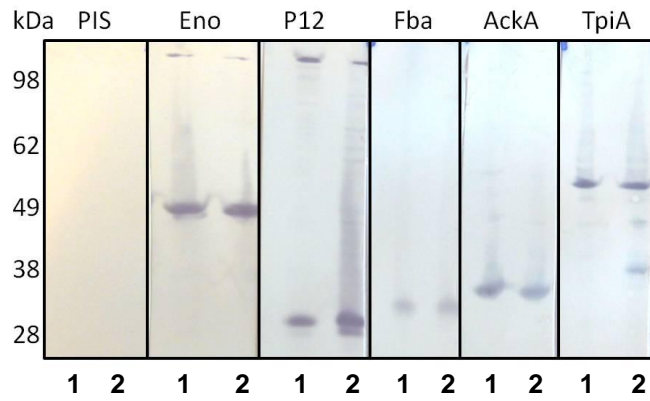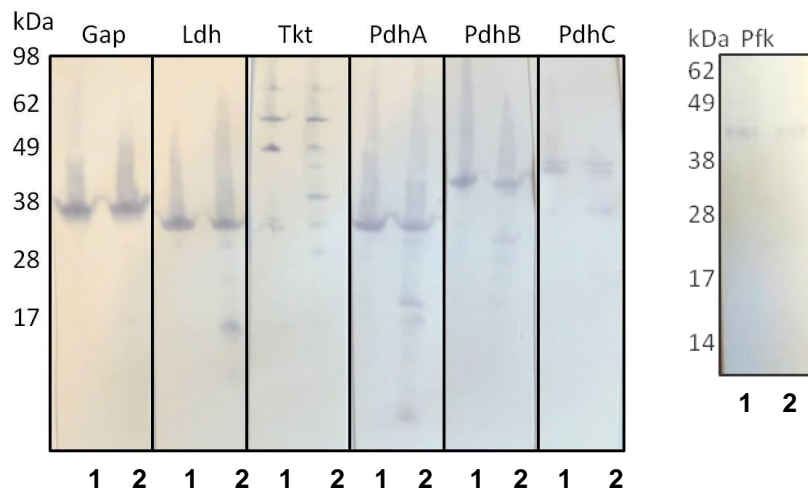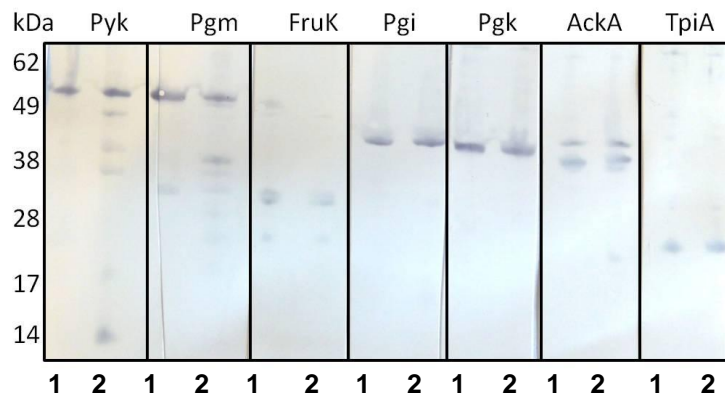

Supplement: IAI.01071-15_zii999091595so6.pdf [file IAI.01071-15_zii999091595so6.pdf]
